# Supplementary material for: Oxidative stress relief to longevity: mulberry-derived anthocyanins enhanced antioxidant defense via Nrf2/SKN-1 activation
Source: Research Square preprint supplement (doi:10.21203/rs.3.rs-7024360/v1), 2025-08-06
Supplement: Supplementary file 1 [file 0f1a747308ad25473f4d1113.docx]

**Table 1**. **Identification and quantification of anthocyanidin compounds in MFAE identified by UPLC-ESI-MS/MS.**

| **Compounds** | **Class** | **Molecular Weight** | **Formula** | Content（μg/g） |
| --- | --- | --- | --- | --- |
| Cyanidin-3-*O*-glucoside | Cyanidin | 449.11 | C21H21O11+ | 1270.872 |
| Cyanidin-3-*O*-rutinoside | Cyanidin | 595.17 | C27H31O15+ | 517.036 |
| Cyanidin-3-gentiobioside | Cyanidin | 611.16 | C27H31O16+ | 12.162 |
| Cyanidin-3,5-*O*-diglucoside | Cyanidin | 611.16 | C27H31O16+ | 11.772 |
| Cyanidin-3-*O*-sophoroside | Cyanidin | 611.16 | C27H31O16+ | 10.891 |
| Cyanidin-3-*O*-xyloside | Cyanidin | 419.10 | C20H19O10+ | 5.877 |
| Cyanidin-3-*O*-(6-*O*-malonyl-beta-D-glucoside) | Cyanidin | 535.11 | C24H23O14+ | 4.575 |
| Cyanidin-3-*O*-(6''-*O*-caffeoyl)rhamnoside | Cyanidin | 595.15 | C30H27O13+ | 4.552 |
| Cyanidin-3-[6''-(Galloy)rhamnoside] | Cyanidin | 585.12 | C28H25O14+ | 1.136 |
| Cyanidin-3-*O*-sambubioside | Cyanidin | 581.15 | C26H29O15+ | 0.938 |
| Cyanidin-3-xylosyl-galactoside | Cyanidin | 581.15 | C26H29O15+ | 0.847 |
| Cyanidin-3-O-(6''-*O*-acetyl-2''-*O*-xylosyl)glucoside | Cyanidin | 623.16 | C28H31O16+ | 0.695 |
| Cyanidin-3,5-*O*-Digalactoside | Cyanidin | 611.16 | C27H31O16+ | 0.314 |
| Cyanidin-glucuronide-glucuronide | Cyanidin | 639.12 | C27H27O18+ | 0.273 |
| Cyanidin-3-malonyl-glucosyl-glucoside | Cyanidin | 697.16 | C30H33O19+ | 0.190 |
| Cyanidin-3-*O*-arabinoside | Cyanidin | 419.10 | C20H19O10+ | 0.150 |
| Cyanidin-3-*O*-glucoside-5-*O*-galactoside | Cyanidin | 611.16 | C27H31O16+ | 0.034 |
| Cyanidin-3-*O*-rutinoside-diglucoside | Cyanidin | 919.27 | C39H51O25+ | 0.030 |
| Cyanidin-3-*O*-(tartaryl)rhamnoside-5-*O*-glucoside | Cyanidin | 727.17 | C31H35O20+ | 0.026 |
| Cyanidin-3-*O*-(6''-ferulylsophoroside)-5-glucoside | Cyanidin | 949.26 | C43H49O24+ | 0.009 |
| Cyanidin-hydroxybenzoyl-di-(malonyl-glucoside) | Cyanidin | 903.18 | C40H39O24+ | 0.009 |
| Cyanidin-3-(malonyl)glucoside-5-rhamnoside | Cyanidin | 681.17 | C30H33O18+ | 0.006 |
| Cyaandin-Galloy-Hydroxyben-rhamnoside-rhamnoside | Cyanidin | 851.20 | C41H39O20+ | 0.006 |
| Cyanidin-3-*O*-(caffeoyl)(coumaroyl)diglucoside-5-*O*-glucoside | Cyanidin | 1081.28 | C51H53O26+ | 0.004 |
| Cyanidin-3-*O*-(sinapoyl)sophoroside-5-*O*-(malonyl)glucoside | Cyanidin | 1065.27 | C47H53O28+ | 0.004 |
| Delphinidin-3-*O*-rutinoside-5-*O*-glucoside | Delphinidin | 773.21 | C33H41O21+ | 36.712 |
| Delphinidin-3-*O*-(coumaroyl)glucoside-5-*O*-galactoside | Delphinidin | 773.19 | C36H37O19+ | 22.966 |
| Delphinidin-3-*O*-galactoside | Delphinidin | 465.10 | C21H21O12+ | 7.355 |
| Delphinidin-3-*O*-glucoside | Delphinidin | 465.10 | C21H21O12+ | 7.035 |
| Delphinidin-3-*O*-(coumaroyl)glucoside-5-*O*-glucoside | Delphinidin | 773.19 | C36H37O19+ | 0.485 |
| Delphinidin-3-*O*-sophoroside | Delphinidin | 627.16 | C27H31O17+ | 0.470 |
| Delphinidin-3-O-glucoside-5-*O*-galactoside | Delphinidin | 627.16 | C27H31O17+ | 0.411 |
| Delphinidin-5-*O*-rhamnoside | Delphinidin | 449.11 | C21H21O11+ | 0.314 |
| Delphinidin-3-*O*-(feruloyl)(xylosyl)rhamnoside | Delphinidin | 757.20 | C36H37O18+ | 0.136 |
| Delphinidin-3-*O*-(6''-*O*-coumaroyl)rhamnoside-5-*O*-galactoside | Delphinidin | 757.20 | C36H37O18+ | 0.070 |
| Delphinidin-3-*O*-(6-*O*-acetyl)-glucoside | Delphinidin | 507.11 | C23H23O13+ | 0.063 |
| Delphinidin | Delphinidin | 303.05 | C15H11O7+ | 0.050 |
| Delphinidin-3,5,7-Triglucoside | Delphinidin | 789.21 | C33H41O22+ | 0.049 |
| Delphinidin-3-*O*-acetyl-glucoside-glucoside | Delphinidin | 669.17 | C29H33O18+ | 0.042 |
| Delphinidin-3-*O*-rutinoside-5-*O*-diglucoside | Delphinidin | 935.25 | C42H47O24+ | 0.027 |
| Delphinidin-3-*O*-(2''-*O*-xylosyl)rutinoside | Delphinidin | 743.20 | C32H39O20+ | 0.026 |
| Delphinidin-3-(6''-*O*-coumaroyl)rutinoside-5-*O*-glucoside | Delphinidin | 919.25 | C42H47O23+ | 0.020 |
| Naringenin | flavonoid | 272.07 | C15H12O5 | 0.004 |
| Malvidin-3-*O*-rutinoside | Malvidin | 639.19 | C29H35O16+ | 0.153 |
| Malvidin-3-*O*-sophoroside | Malvidin | 655.19 | C29H35O17+ | 0.057 |
| Malvidin-3-*O*-(6''-*O*-feruloyl)galactoside | Malvidin | 669.18 | C33H33O15+ | 0.017 |
| Malvidin-3-*O*-5-*O*-(6-*O*-coumaroyl)-diglucoside | Malvidin | 801.22 | C38H41O19+ | 0.004 |
| Pelargonidin-3-*O*-coumaroyl-5-*O*-galactoside | Pelargonidin | 579.15 | C30H27O12+ | 48.095 |
| Pelargonidin-3-*O*-rutinoside | Pelargonidin | 579.17 | C27H31O14+ | 43.234 |
| Pelargonidin-3-*O*-glucoside | Pelargonidin | 433.11 | C21H21O10+ | 42.722 |
| Pelargonidin-3,5-*O*-Digalactoside | Pelargonidin | 595.17 | C27H31O15+ | 1.096 |
| Pelargonidin-3,5-*O*-diglucoside | Pelargonidin | 595.17 | C27H31O15+ | 0.510 |
| Pelargonidin-3-*O*-(6''-*O*-malonyl)galactoside | Pelargonidin | 519.11 | C24H23O13+ | 0.114 |
| Pelargonidin-3-*O*-xyloside | Pelargonidin | 403.10 | C20H19O9+ | 0.114 |
| Pelargonidin-3-*O*-(xylosyl)glucoside | Pelargonidin | 565.16 | C26H29O14+ | 0.087 |
| Pelargonidin-3-*O*-(2''-*O*-sinapoyl)glucoside-5,7-di-*O*-glucoside | Pelargonidin | 963.28 | C44H51O24+ | 0.003 |
| Pelargonidin-3-*O*-(hydroxyferuloyl)(glucosyl)rhamnoside | Pelargonidin | 771.21 | C39H39O18+ | 0.002 |
| Peonidin-3-*O*-glucoside | Peonidin | 463.12 | C22H23O11+ | 3.187 |
| Peonidin-3-*O*-(6-*O*-p-coumaroyl)-galactoside | Peonidin | 609.16 | C31H29O13+ | 0.458 |
| Peonidin-3,5-*O*-diglucoside | Peonidin | 625.18 | C28H33O16+ | 0.076 |
| Peonidin-3-*O*-sophoroside | Peonidin | 625.18 | C28H33O16+ | 0.032 |
| Peonidin-3-*O*-sinapoyl-caffeoyl-glucoside-5-*O*-galactoside | Peonidin | 993.27 | C48H49O23+ | 0.002 |
| Peonidin-3-*O*-(sinapoyl)sophoroside-5-*O*-galactoside | Peonidin | 993.29 | C45H53O25+ | 0.001 |
| Petunidin-3-*O*-(6-*O*-p-coumaroyl)-glucoside | Petunidin | 625.16 | C31H29O14+ | 0.157 |
| Petunidin-glucoside-galactoside | Petunidin | 641.17 | C28H33O17+ | 0.031 |
| Petunidin-3-*O*-arabinoside | Petunidin | 449.11 | C21H21O11+ | 0.018 |
| Petunidin-3-*O*-sophoroside | Petunidin | 641.17 | C28H33O17+ | 0.008 |
| Petunidin-acetyl-glucoside-glucoside | Petunidin | 683.18 | C30H35O18+ | 0.003 |
| Procyanidin A2 | Procyanidin | 576.13 | C30H24O12 | 0.020 |
